# Supplementary material for: Functionalized graphene sheets for intracellular controlled release of therapeutic agents
Source: Royal Society of Chemistry journal article supplement (doi:10.1039/c7nr06588d), 2017-01-01
Supplement: c7nr06588d1.pdf [file c7nr06588d1.pdf]

## Supporting Information

### Functionalized Graphene Sheets for Intracellular Controlled Release of Therapeutic Agents

Zhaoxu Tu,<sup>a</sup> Virginia Wycisk,<sup>a</sup> Chong Cheng,<sup>a</sup> Wei Chen,<sup>a,c</sup> Mohsen Adeli,<sup>a,b\*</sup> Rainer Haag<sup>a\*</sup>

<sup>a</sup>*Institut für Organische Chemie und Biochemie, Freie Universität Berlin, Takustraße 3,  
14195 Berlin, Germany E-mail: haag@chemie.fu-berlin.de*

<sup>b</sup>*Department of Chemistry, Faculty of Science, Lorestan University, Khorram Abad, Iran E-  
mail: aadeli@fu-berlin.de*

<sup>c</sup>*Department of Pharmaceutical Engineering, China Pharmaceutical University, Nanjing  
210009, China*

## Table of contents

|                                                                                             |   |
|---------------------------------------------------------------------------------------------|---|
| 1. Detailed structure of pH-sensitive dye (pSD) and the detailed conjugation reaction ..... | 3 |
| 2. UV-vis absorption and fluorescence spectra .....                                         | 3 |
| 3. Relative fluorescence intensity .....                                                    | 4 |
| 4. Protein adsorption .....                                                                 | 5 |
| 5. Solubility tests.....                                                                    | 6 |
| 6. Characterization of GA <sub>D</sub> and GS <sub>D</sub> .....                            | 7 |
| 7. Biocompatibility of GA and GS .....                                                      | 8 |
| 8. CLSM experiments .....                                                                   | 9 |

## 1. Detailed structure of pH-sensitive dye (pSD) and the detailed conjugation reaction

**Scheme S1.** The detailed structure of pSD and the detailed conjugation reaction.

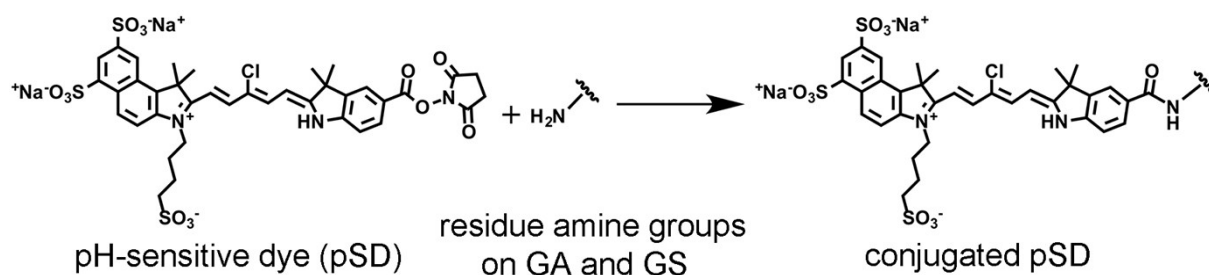

## 2. UV-vis absorption and fluorescence spectra

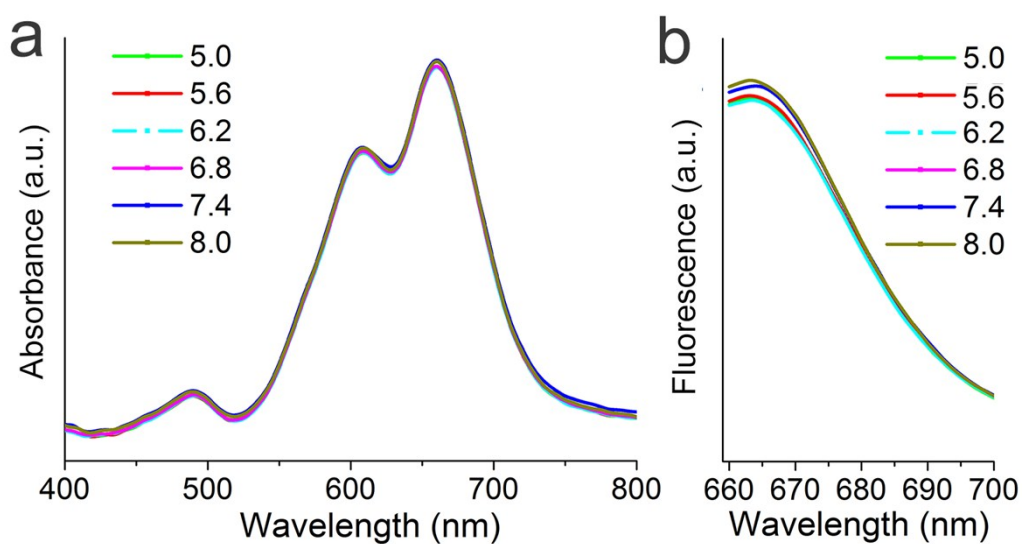

**Figure S1.** UV-vis absorption and fluorescence spectra (excitation: 635 nm) of  $\text{GA}_{\text{IDCC}}$  with pH ranging from 5.0 to 8.0.

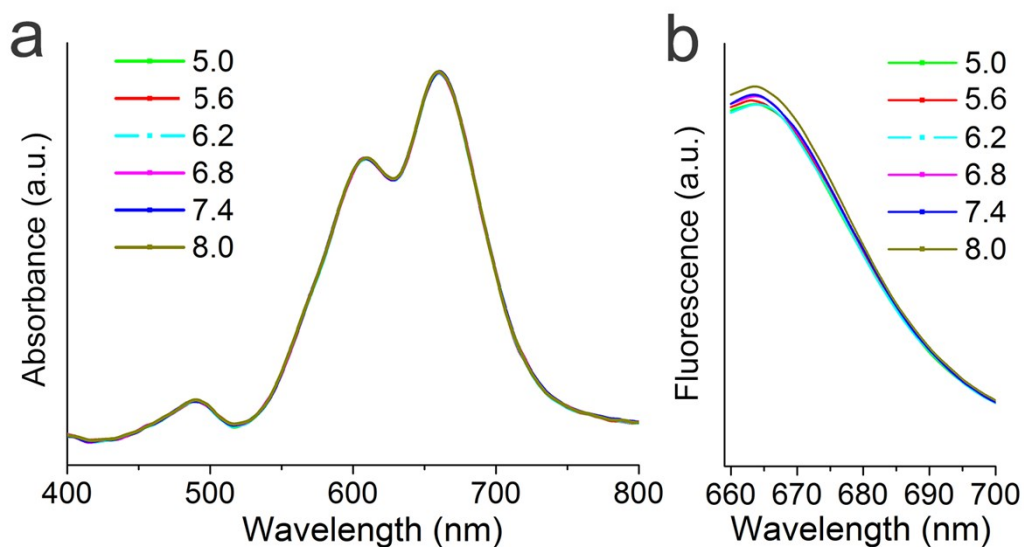

**Figure S2.** UV-vis absorption and fluorescence spectra (excitation: 635 nm) of  $GS_{IDCC}$  with pH ranging from 5.0 to 8.0.

### 3. Relative fluorescence intensity

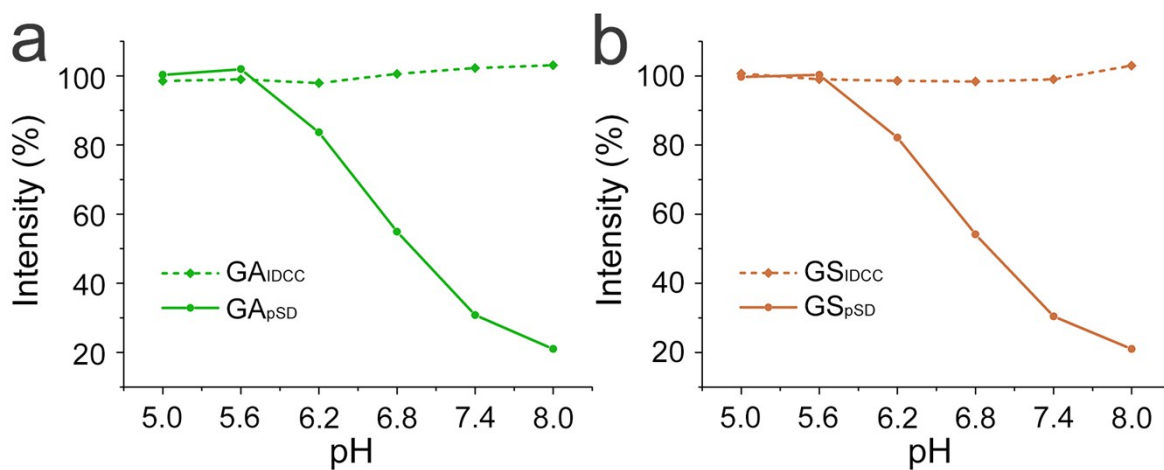

**Figure S3.** The relative fluorescence intensity (excitation: 640 nm, emission: 670 nm) of  $GA_{pSD}$  and  $GS_{pSD}$  compared with  $GA_{IDCC}$  and  $GS_{IDCC}$  with pH ranging from 5.0 to 8.0.

#### 4. Protein adsorption

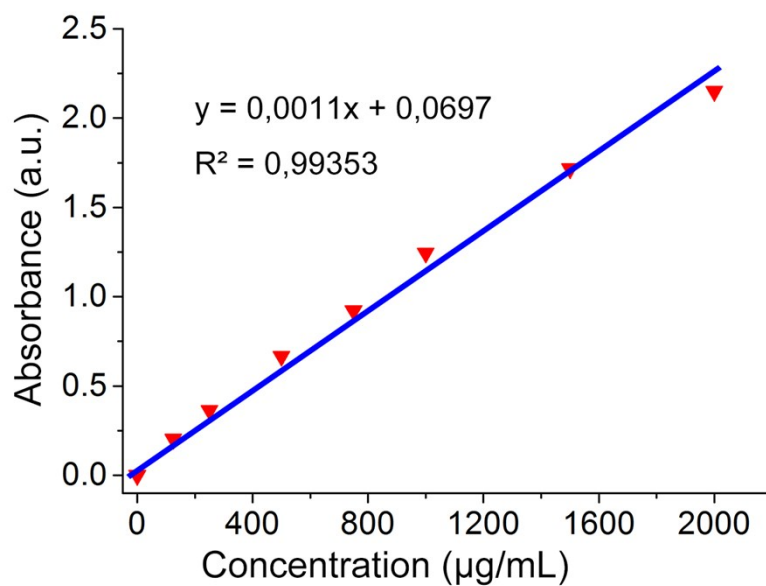

**Figure S4.** The calibration curve of bovine serum albumin (BSA) in PBS with the absorption at 562 nm.

As the absorption for the initial BSA concentration was 0.7082 and the value for the BSA concentration in the supernatant of GA and GS was  $0.6759 \pm 0.0182$  and  $0.7077 \pm 0.0067$ , respectively. With Equation 2 we calculated the protein absorption capacity of GA as  $0.058 \pm 0.002$  mg/mg and the value for GS was almost 0.

## 5. Solubility tests

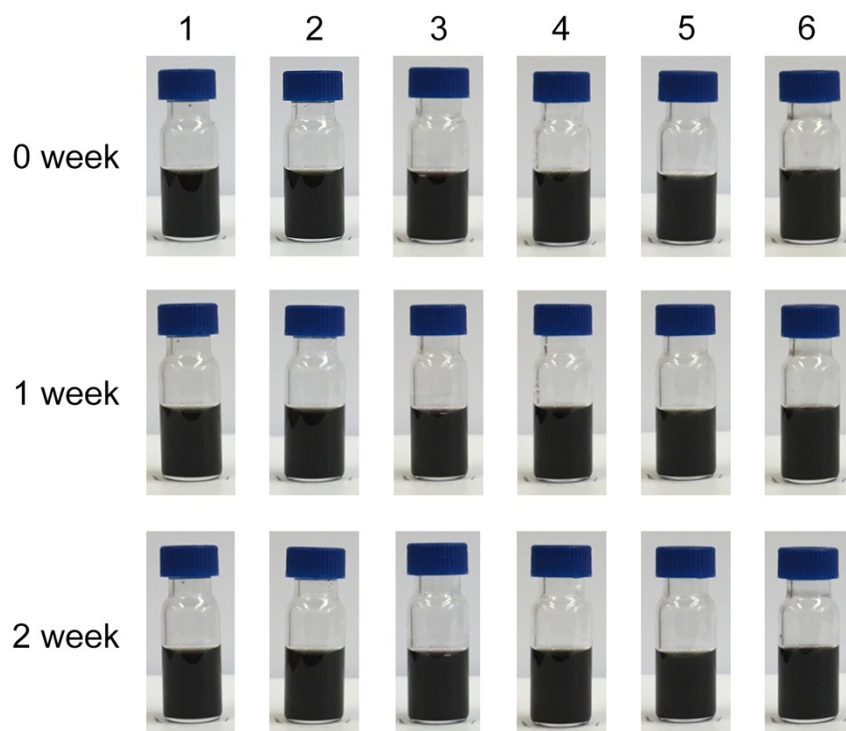

**Figure S5.** The solubility tests at 1<sup>st</sup> week, and 2<sup>nd</sup> week for GA dispersed in PBS (1), GA<sub>p</sub> dispersed in PBS (2), GA dispersed in DMEM (3), GS dispersed in PBS (4), GS<sub>p</sub> dispersed in PBS (5), GS dispersed in DMEM (6). The concentration of each sample was 1 mg/mL.

## 6. Characterization of GA<sub>D</sub> and GS<sub>D</sub>

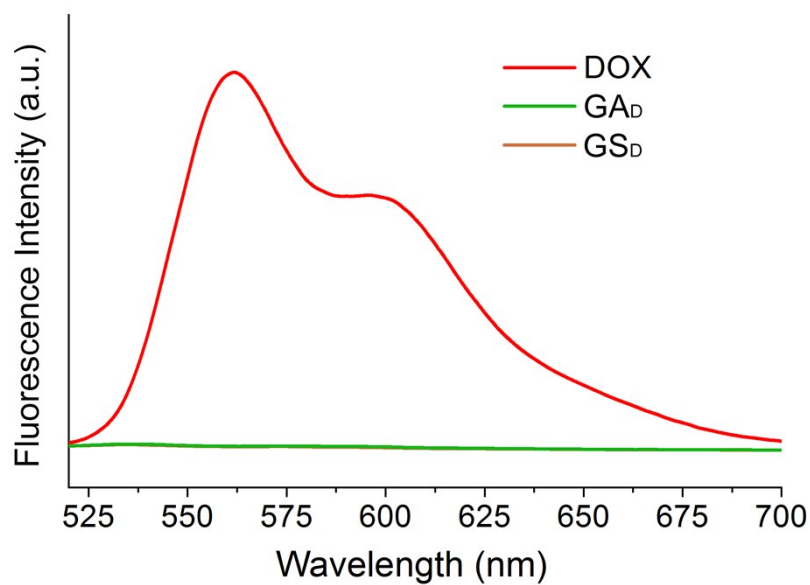

**Figure S6.** Fluorescence (excitation: 498 nm) of DOX, GS<sub>D</sub>, and GA<sub>D</sub> (10 μg/mL).

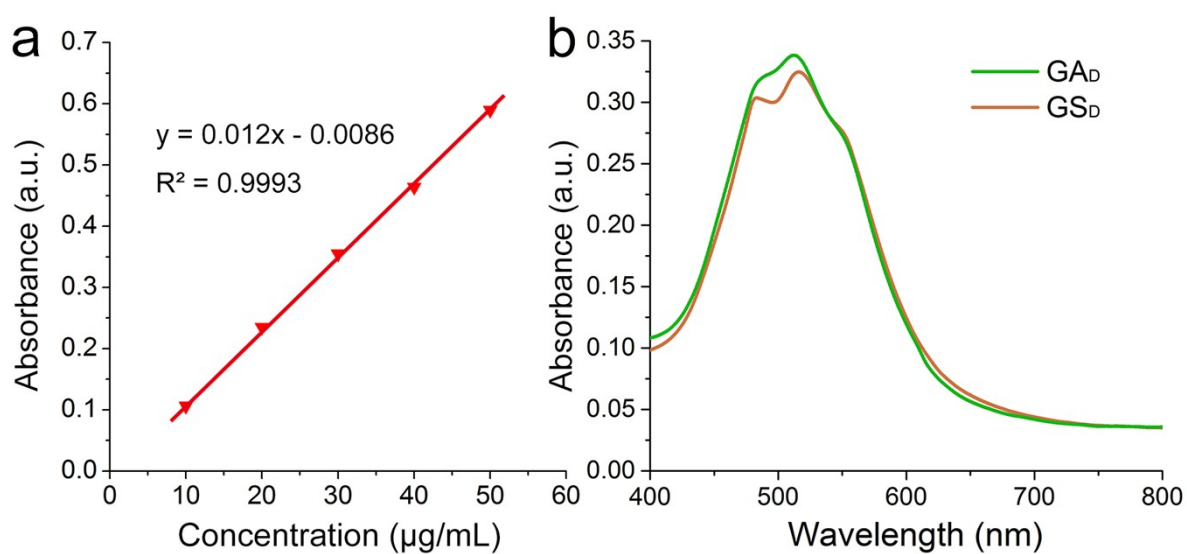

**Figure S7.** (a) The calibration curve of DOX in PBS with the absorption at 545 nm; (b) the absorption spectra of GA<sub>D</sub> and GS<sub>D</sub> (the concentration of GA and GS was 15 μg/mL), GA and GS (15 μg/mL) were employed as background, respectively.

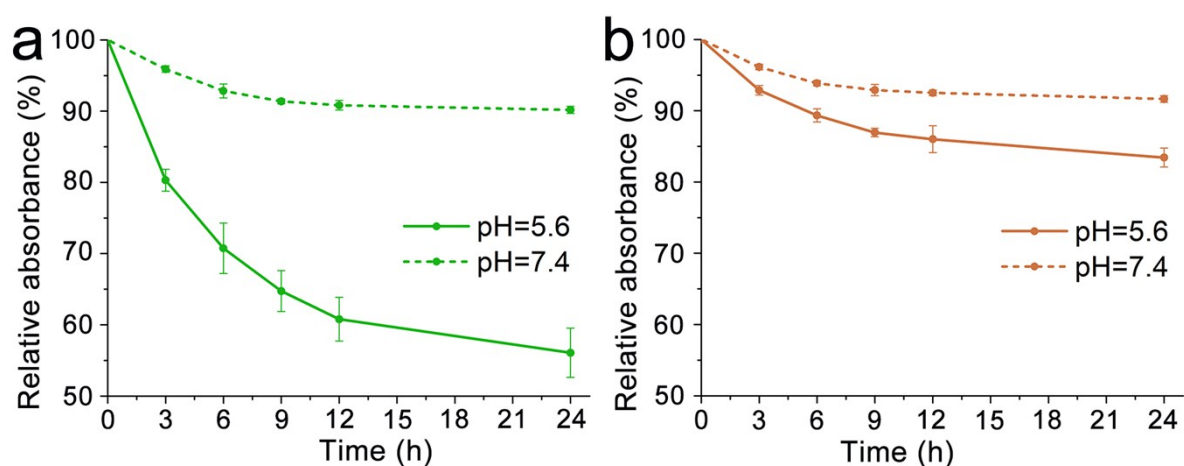

**Figure S8.** The time course of the relative absorbance (545 nm) change of GA<sub>D</sub> (a) and GS<sub>D</sub> (b) solution at 37 °C in various media. Means  $\pm$  SD (n = 3). The absorbance at starting point is set as 100%.

## 7. Biocompatibility of GA and GS

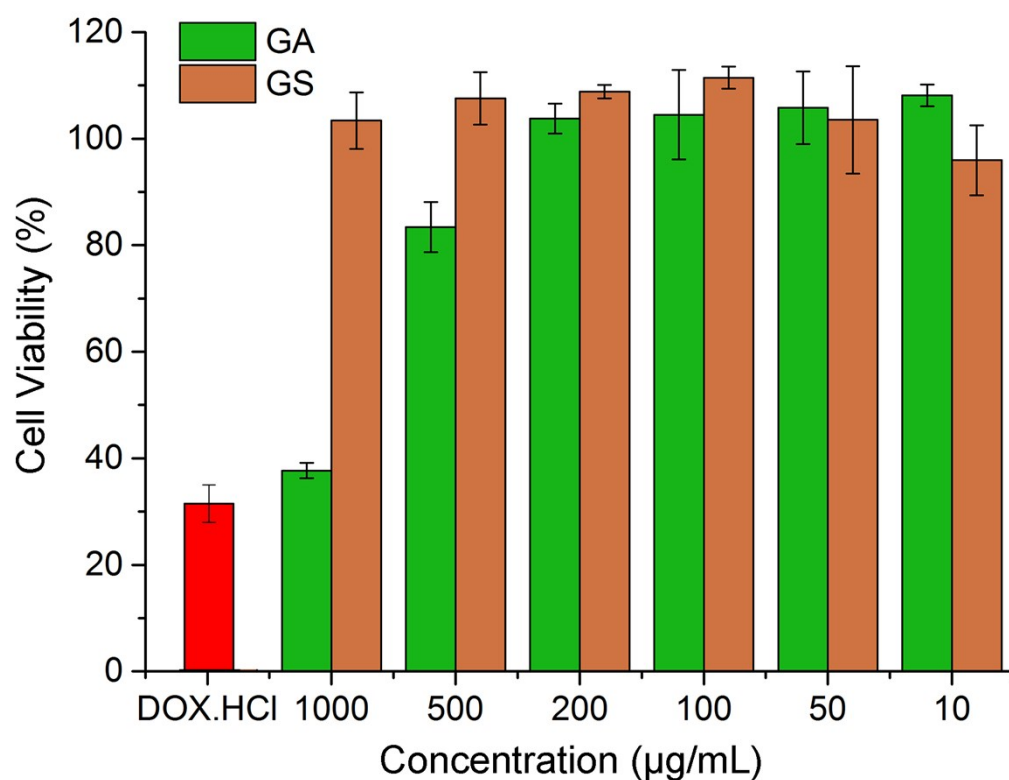

**Figure S9.** The cytotoxicity data of GS and GA obtained from the CCK8 assay of A549 cells after 48 h treatment. DOX.HCl (2 µg/mL) was applied as positive control.



## 8. CLSM experiments

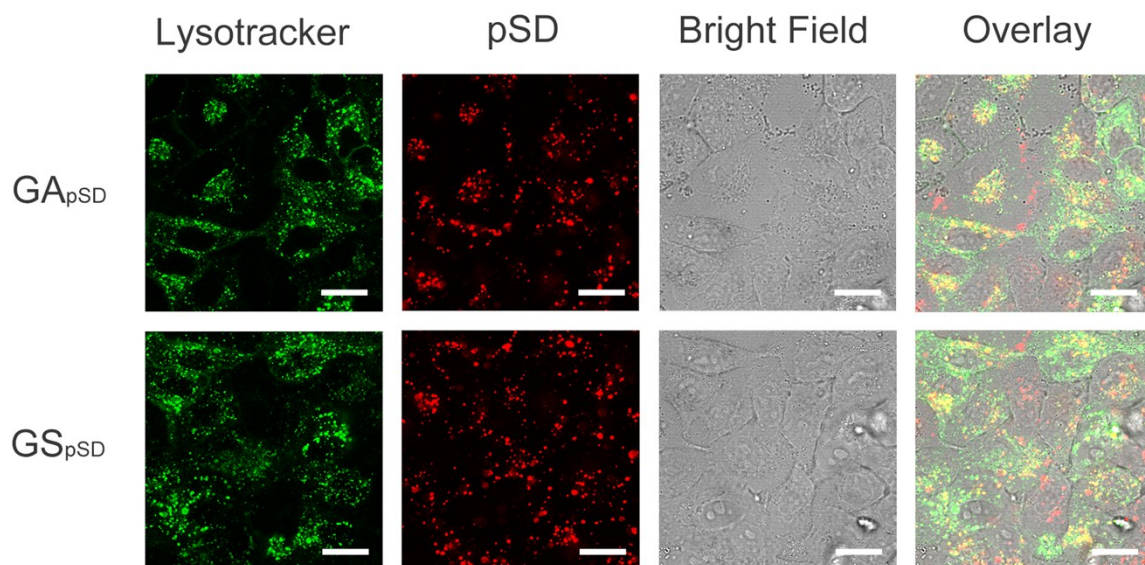

**Figure S10.** CLSM images of A549 cells incubated for 30 min with GA<sub>pSD</sub> and GS<sub>pSD</sub>, respectively. Images were taken after a washing step at 4 h. Scale bars correspond to 25  $\mu$ m.

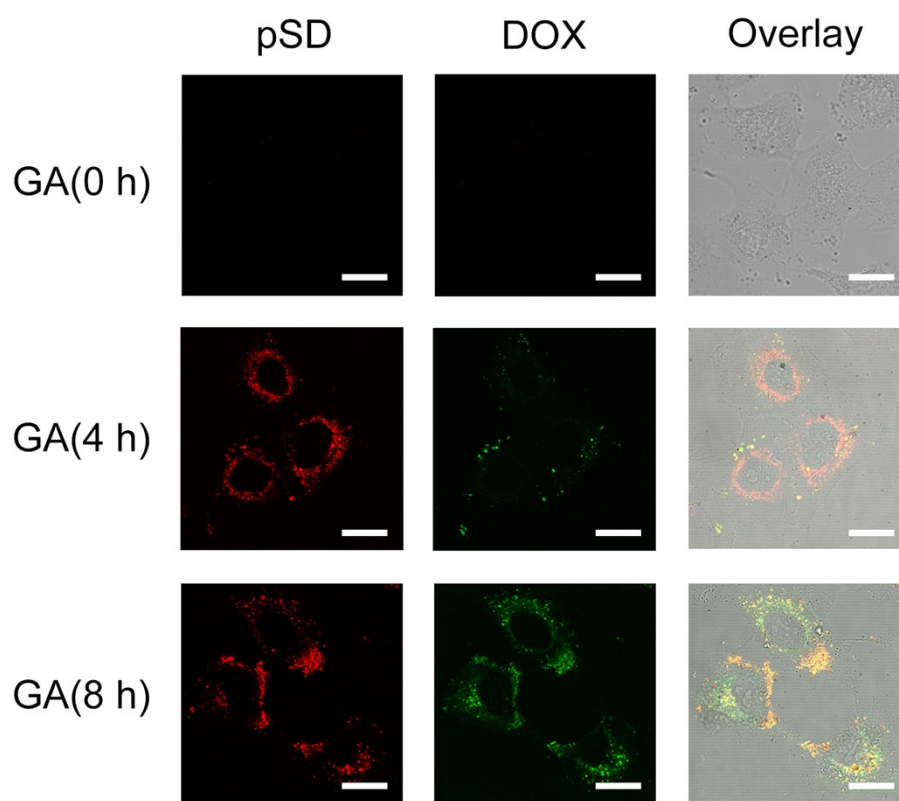

**Figure S11.** CLSM images of A549 cells incubated for 30 min with pSD-labeled GA<sub>D</sub>.

Images were taken after a washing step at 0 h, 4 h and 8 h, respectively. Scale bars correspond to 25  $\mu\text{m}$ .

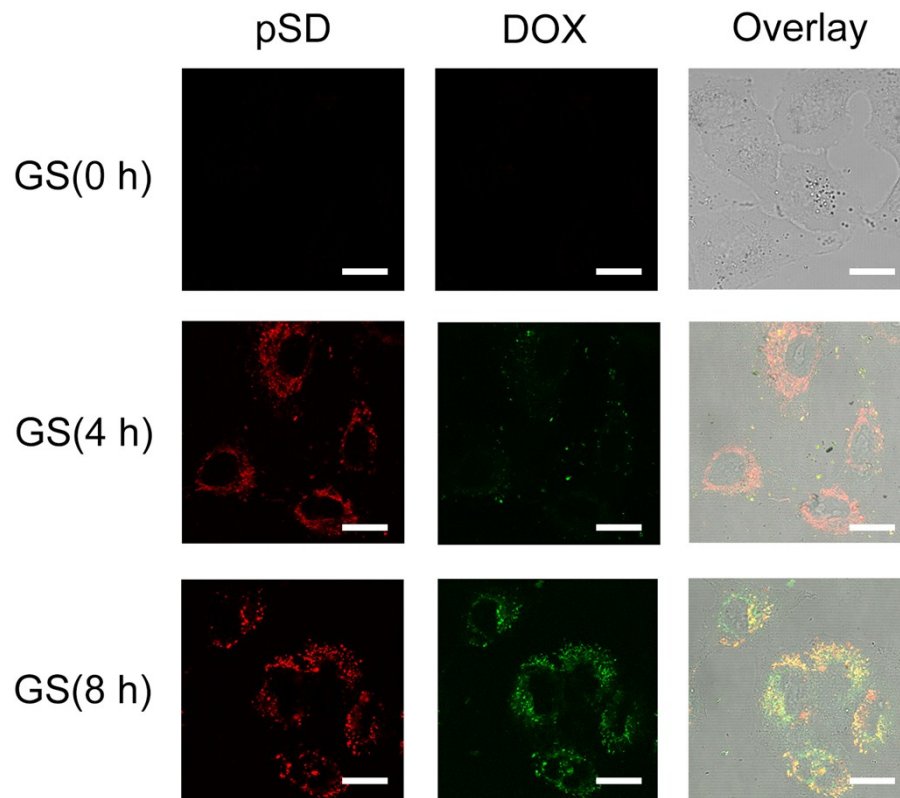

**Figure S12.** CLSM images of A549 cells incubated for 30 min with pSD-labelled GS<sub>D</sub>. Images were taken after a washing step at 0 h, 4 h, and 8 h, respectively. Scale bars correspond to 25  $\mu$ m.
